# Supplementary material for: Quality-by-Design-Based Development of a Voxelotor Self-Nanoemulsifying Drug-Delivery System with Improved Biopharmaceutical Attributes
Source: MDPI journal article supplement (doi:10.3390/pharmaceutics13091388), 2021-09-02
Supplement: s1 [file s1]

## Article

# Quality-by-design-based development of a voxelotor self-nanoemulsifying drug-delivery system with improved biopharmaceutical attributes

Aristote B. Buya<sup>1,3</sup>, Romano Terrasi<sup>2</sup>, Jérémie K. Mbinze<sup>3</sup>, Giulio G. Muccioli<sup>2</sup>, Ana Beloqui<sup>1</sup>, Patrick B. Memvanga<sup>3</sup>, Véronique Prétat<sup>1\*</sup>

## Supplementary materials

**Table S1.** Validation results obtained for the HPLC quantification method of voxelotor.

| Validation criteria                                   |                                | Concentration levels (µg/mL) for voxelotor |          |         |         |
|-------------------------------------------------------|--------------------------------|--------------------------------------------|----------|---------|---------|
|                                                       |                                | 2.5                                        | 10       | 25      | 75      |
| Response function                                     |                                |                                            |          |         |         |
| Trueness                                              | Relative bias (%)              | 0.0018                                     | -4.0894  | 1.5739  | 5.8087  |
| Precision                                             | Repeatability (RSD %)          | 0.5863                                     | 1.2562   | 0.6054  | 3.0666  |
|                                                       | Intermediate precision (RSD %) | 0.9519                                     | 2.7611   | 1.9830  | 2.5451  |
| Accuracy (95% relative $\beta$ -expectation lower and |                                | -3.3838                                    | -14.0593 | -8.2013 | -0.4523 |
| Upper tolerance limits in %)                          |                                | 3.3875                                     | 5.8804   | 11.3492 | 12.0697 |
| Uncertainty (µg/mL)                                   |                                | 0.0265                                     | 0.3000   | 0.5769  | 2.0305  |
| Expanded uncertainty (µg/mL)                          |                                | 0.053                                      | 0.0531   | 1.1538  | 4.0610  |
| Relative expanded uncertainty (%)                     |                                | 2.1277                                     | 6.0093   | 4.6153  | 5.4147  |
| Linearity                                             | slope                          | 1.0659                                     |          |         |         |
|                                                       | Intercept                      | -0.7684                                    |          |         |         |
|                                                       | R <sup>2</sup>                 | 0.9986                                     |          |         |         |

**Table S2.** Emulsification study of surfactant/cosurfactant combinations.

| Cosurfactant            | % Transmittance |
|-------------------------|-----------------|
|                         | Cremophor-EL®   |
| Transcutol HP®          | 99.8 ± 0.85     |
| Propylene glycol        | 99.4 ± 0.45     |
| Polyethylene glycol 400 | 99.6 ± 1.62     |
| Labrafil M® 1944 CS     | 98.3 ± 0.65     |
| Labrafil M® 2125 CS     | 89.4 ± 0.15     |

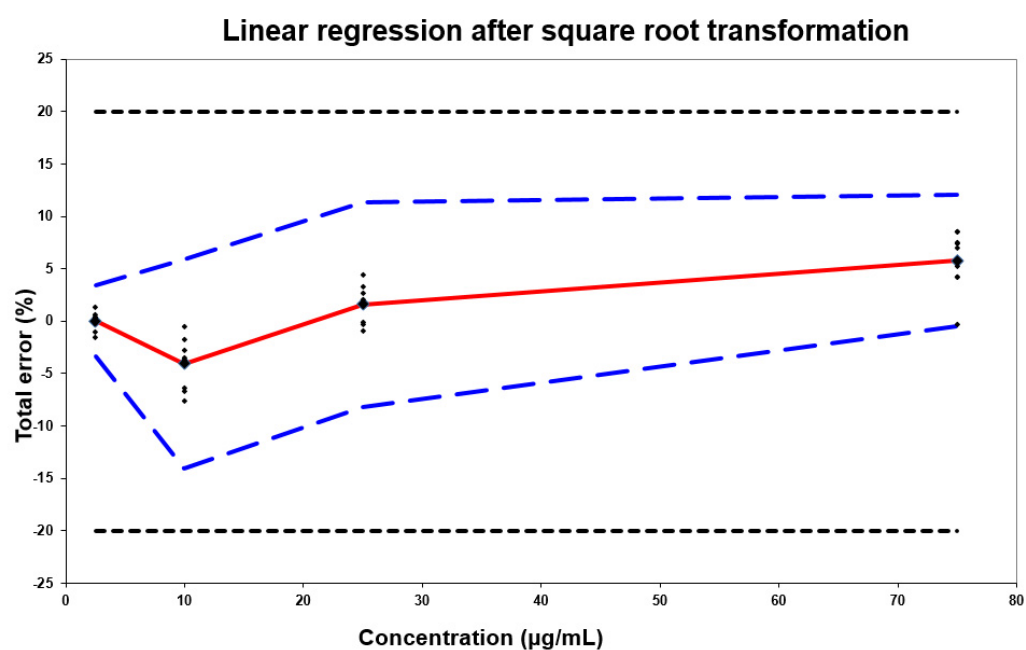

**Figure S1.** Accuracy profile of HPLC method obtained with four concentration levels of voxelotor. The plain line is the relative bias, dashed lines are the  $\beta$ -expectation tolerance limits ( $\beta=95\%$ ) and dotted lines represent the acceptance limits ( $\pm 20\%$ ). The dots represent the relative back-calculated concentrations of the validation standards and are plotted according to their target concentration.

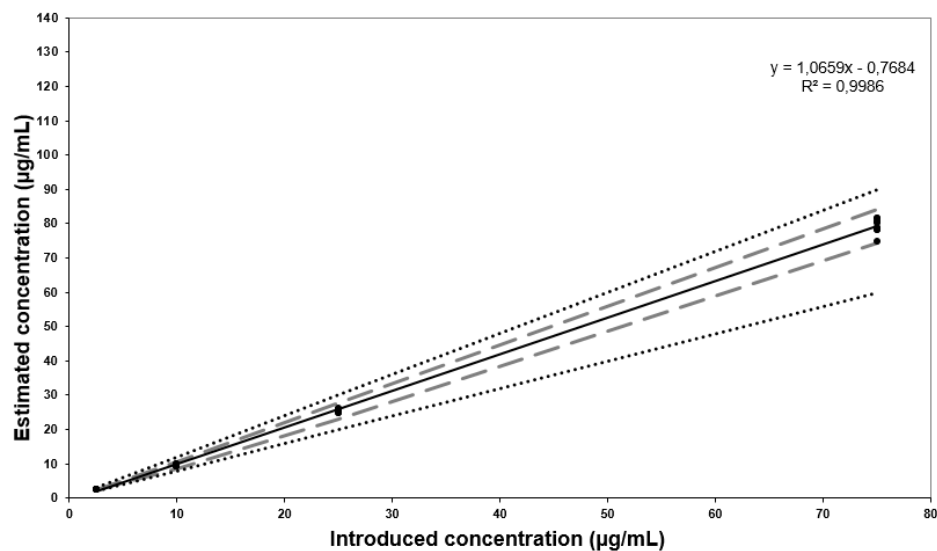

**Figure S2.** Linear profile of HPLC method obtained with four concentration levels of Voxelotor. The plain line is the identity line ( $y=x$ ), the dashed line is the  $\beta$ -expectation tolerance limits ( $\beta=95\%$ ) and dotted lines represent the acceptance limits ( $\pm 20\%$ ).
